# Supplementary material
Source: PubMed Central journal article supplement (PMC7524515)

# THE LANCET

## Supplementary appendix

This appendix formed part of the original submission. We post it as supplied by the authors.

Supplement to: Cauchemez S, Tran Kiem C, Paireau J, Rolland P, Fontanet A. Lockdown impact on COVID-19 epidemics in regions across metropolitan France. *Lancet* 2020; published online Sept 29. [http://dx.doi.org/10.1016/S0140-6736\(20\)32034-1](http://dx.doi.org/10.1016/S0140-6736(20)32034-1).

**Figure:** Daily hospital admissions of COVID-19 patients per 100,000 inhabitants in the 13 regions of metropolitan France (SI-VIC database). All COVID-19 patients are either biologically confirmed or present with a computed tomographic image highly suggestive of SARS-CoV-2 infection. The grey lines correspond to raw data. The purple lines correspond to the 7-day moving average. The horizontal black dotted lines indicate a level of 1 daily hospital admission per 100,000 inhabitants. The vertical orange lines indicate the day the nationwide lockdown was enforced. The vertical blue lines indicate the national peak in hospital admissions. The vertical red dotted lines indicate the regional peaks in hospital admissions. Abbreviations for the names of the regions: ARA – Auvergne-Rhône-Alpes ; BFC – Bourgogne-Franche-Comté ; BRE – Bretagne ; CVL – Centre-Val de Loire ; COR – Corse ; GES – Grand Est ; HDF – Hauts-de-France ; IDF – Île-de-France ; NAQ – Nouvelle-Aquitaine ; NOR – Normandie ; OCC – Occitanie ; PAC – Provence-Alpes-Côte d’Azur ; PDL – Pays de la Loire.

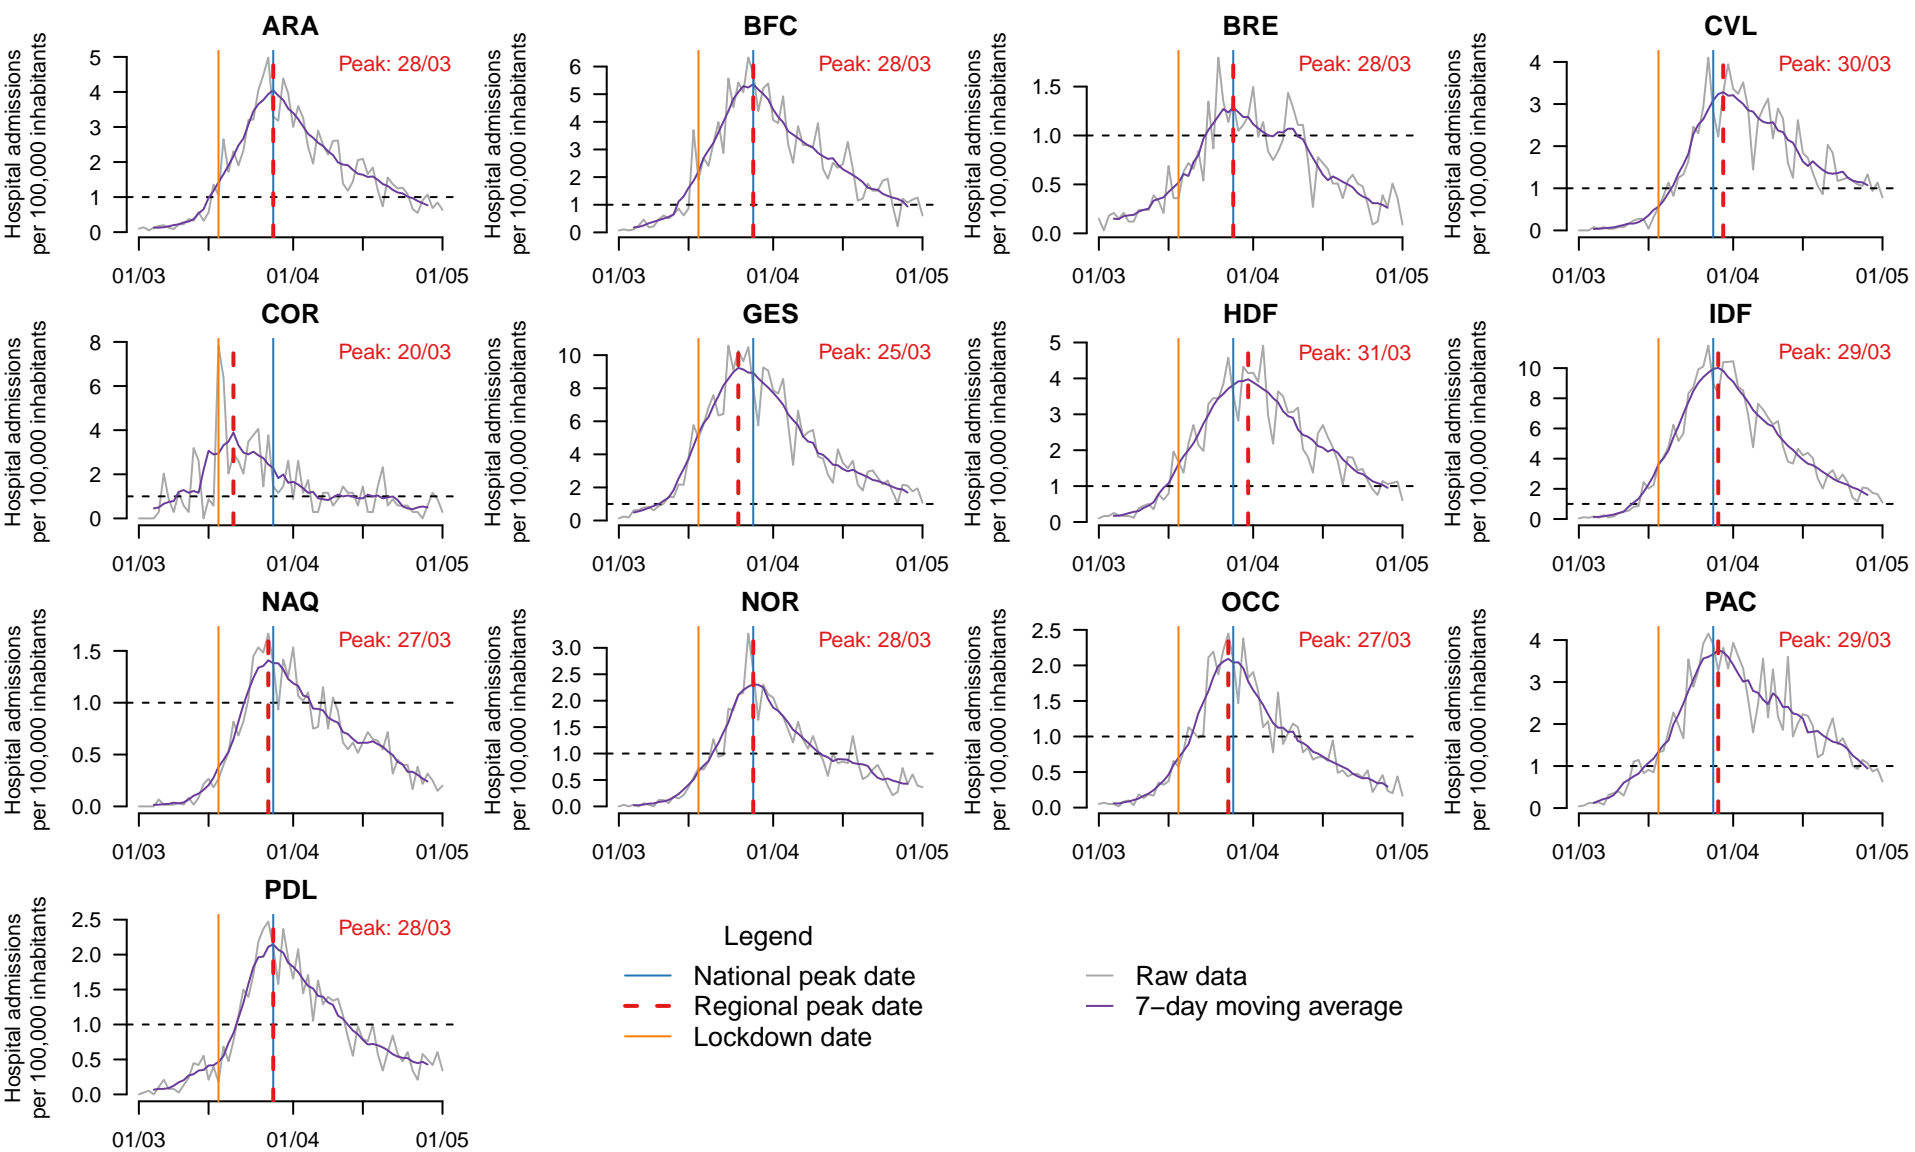

Supplement: mmc1.pdf [file mmc1.pdf]
